# Supplementary material
Source: publisher figshare collection journal article supplement (https://gsajournals.figshare.com/articles/dataset/_/12674369)
Supplement: Supplementary file 1 [file 1]

**Table S1** Genome-wide association studies. Only regions with over 5% of WPPA were shown. The ADE model with BayesB was used for the association studies. CL, culm length; TW, total weight; BR, brix; CD, culm diameter; CN, culm number; PL, panicle length. A, additive; D, dominance.

| Trait | Effect  | Chromosome | Region (Mb) | Probability (%) |
|-------|---------|------------|-------------|-----------------|
| CL    | A       | 1          | 10 - 11     | 5.1             |
|       |         | 1          | 66 - 67     | 16.0            |
|       |         | 1          | 67 - 68     | 6.5             |
|       |         | 1          | 69 - 70     | 8.2             |
|       |         | 3          | 30 - 31     | 7.0             |
|       |         | 3          | 64 - 65     | 16.6            |
|       |         | 4          | 16 - 17     | 6.0             |
|       |         | 4          | 25 - 26     | 11.5            |
|       |         | 6          | 5 - 6       | 9.4             |
|       |         | 6          | 7 - 8       | 12.9            |
|       |         | 6          | 13 - 14     | 5.1             |
|       |         | 6          | 31 - 32     | 9.5             |
|       |         | 6          | 40 - 41     | 10.1            |
|       |         | TW         | D           | 9               |
| A     | 1       |            | 14 - 15     | 7.2             |
|       | 6       |            | 6 - 7       | 32.6            |
|       | 6       |            | 13 - 14     | 95.3            |
| BR    | A       | 6          | 40 - 41     | 6.7             |
|       |         | 9          | 31 - 32     | 5.2             |
|       |         | 1          | 62 - 63     | 6.0             |
|       |         | 3          | 30 - 31     | 9.1             |
| CD    | A       | 3          | 57 - 58     | 23.3            |
|       |         | 8          | 14 - 15     | 5.4             |
|       |         | 10         | 24 - 25     | 5.3             |
|       |         | 1          | 50 - 51     | 15.3            |
|       |         | 3          | 36 - 37     | 6.4             |
|       |         | 3          | 67 - 68     | 63.0            |
|       |         | 4          | 15 - 16     | 9.0             |
|       |         | 4          | 50 - 51     | 13.1            |
|       |         | 4          | 68 - 69     | 15.6            |
|       |         | 5          | 54 - 55     | 28.8            |
|       |         | 6          | 3 - 4       | 17.6            |
|       |         | 6          | 5 - 6       | 43.4            |
|       |         | 6          | 6 - 7       | 39.7            |
|       |         | 6          | 7 - 8       | 8.5             |
|       |         | 6          | 13 - 14     | 44.7            |
|       |         | 6          | 36 - 37     | 7.4             |
| 6     | 38 - 39 | 5.2        |             |                 |
| 6     | 40 - 41 | 6.2        |             |                 |
| 7     | 0 - 1   | 8.4        |             |                 |
| 7     | 47 - 48 | 5.2        |             |                 |
| 8     | 60 - 61 | 5.2        |             |                 |

|    |   |    |         |      |
|----|---|----|---------|------|
|    |   | 10 | 8 - 9   | 6.8  |
|    |   | 10 | 15 - 16 | 7.3  |
|    |   | 10 | 24 - 25 | 8.3  |
|    |   | 10 | 58 - 59 | 14.2 |
| CN | A | 1  | 50 - 51 | 6.2  |
|    |   | 3  | 30 - 31 | 20.8 |
|    |   | 4  | 16 - 17 | 6.6  |
|    |   | 4  | 25 - 26 | 5.5  |
|    |   | 5  | 4 - 5   | 9.0  |
|    |   | 5  | 63 - 64 | 11.9 |
|    |   | 6  | 13 - 14 | 6.7  |
|    |   | 7  | 48 - 49 | 6.7  |
|    |   | 9  | 31 - 32 | 9.4  |
|    |   | 10 | 3 - 4   | 11.0 |
|    |   | 10 | 20 - 21 | 7.1  |
|    |   | 10 | 46 - 47 | 7.9  |
| PL | A | 1  | 19 - 20 | 53.7 |
|    |   | 1  | 32 - 33 | 5.0  |
|    |   | 1  | 47 - 48 | 18.9 |
|    |   | 1  | 50 - 51 | 7.8  |
|    |   | 1  | 53 - 54 | 47.2 |
|    |   | 2  | 19 - 20 | 5.2  |
|    |   | 2  | 26 - 27 | 7.0  |
|    |   | 3  | 30 - 31 | 5.5  |
|    |   | 3  | 36 - 37 | 16.9 |
|    |   | 3  | 70 - 71 | 52.6 |
|    |   | 6  | 13 - 14 | 5.8  |
|    |   | 6  | 44 - 45 | 30.5 |
|    |   | 6  | 47 - 48 | 92.1 |
|    |   | 8  | 15 - 16 | 5.4  |
|    |   | 9  | 3 - 4   | 7.6  |
|    |   | 9  | 31 - 32 | 7.0  |
|    |   | 10 | 3 - 4   | 5.3  |

---
